# Supplementary material for: From skin sensitizers to wastewater: the unknown photo-deactivation process of low-lying excited states of isothiazolinones. A non-adiabatic dynamics investigation
Source: Royal Society of Chemistry journal article supplement (doi:10.1039/d4cp00998c), 2024-01-01
Supplement: d4cp00998c1.pdf [file d4cp00998c1.pdf]

## SUPPORTING INFORMATION

for

### **From skin sensitizer to wastewater: the unknown photo-deactivation process of low-lying excited states of Isothiazolinones, a non-adiabatic dynamics investigation**

Bruno Bercini de Araújo\*<sup>1</sup> and Paulo Fernando Bruno Gonçalves<sup>1</sup>

<sup>1</sup>Grupo de Química Teórica, Universidade Federal do Rio Grande do Sul – Instituto de Química, Bento Gonçalves 9500, CP 15003, CEP 91501970

Correspondence: [bruno.bercini@gmail.com](mailto:bruno.bercini@gmail.com) ; [paulo@iq.ufrgs.br](mailto:paulo@iq.ufrgs.br)

## Table of Contents

|                                                    |    |
|----------------------------------------------------|----|
| <b>Ground State XYZ Coordinates</b> .....          | 3  |
| ISO .....                                          | 3  |
| MIT .....                                          | 3  |
| CIT .....                                          | 3  |
| BIT .....                                          | 3  |
| <b>MIT (12,9) Active Space</b> .....               | 5  |
| <b>CIT (12,9) Active Space</b> .....               | 6  |
| <b>BIT (16,13) Active Space</b> .....              | 7  |
| <b>S-N Dissociation Path XYZ Coordinates</b> ..... | 8  |
| <b>S-C Dissociation Path XYZ Coordinates</b> ..... | 10 |

## Ground State XYZ Coordinates

### ISO

C 0.00000000 0.00000000 0.00000000  
C -1.35040900 -0.08992100 0.00000000  
S -2.14624000 1.45056300 0.00000000  
N -0.62411600 2.22000200 0.00000000  
C 0.49760100 1.38218400 0.00000000  
O 1.64919200 1.79930400 0.00000000  
H -0.54020500 3.22819600 0.00000000  
H -1.96482300 -0.98762900 0.00000000  
H 0.68296300 -0.84498500 0.00000000

### MIT

C 0.00000000 0.00000000 0.00000000  
N 0.14745700 -1.44627900 0.00000000  
C -0.95278400 -2.31701600 -0.00000000  
C -0.42149500 -3.69103700 -0.00000000  
C 0.94005900 -3.75641800 -0.00000000  
S 1.69409400 -2.19159100 -0.00000000  
H 1.57084800 -4.64809200 -0.00000000  
H -1.08536000 -4.55685700 -0.00000000  
O -2.12318100 -1.93618000 0.00000000  
H -1.08497900 0.18279800 0.00000000  
H 0.44998400 0.44803700 0.90129300  
H 0.44998400 0.44803700 -0.90129300

### CIT

C 0.00000000 0.00000000 0.00000000  
N 0.41520000 -1.39417900 0.00000000  
C 1.76284600 -1.78661100 0.00000000  
C 1.80203100 -3.25924300 0.00000000  
C 0.56452600 -3.82689900 0.00000000  
S -0.74258600 -2.66828200 0.00000000  
Cl 0.17575500 -5.50477100 0.00000000  
H 2.74068600 -3.81420200 0.00000000  
O 2.70165000 -0.99341100 0.00000000  
H 0.93309100 0.58260600 0.00000000  
H -0.58614300 0.24252500 -0.90176400  
H -0.58614300 0.24252500 0.90176400

### BIT

C 0.000000 0.000000 0.000000

|   |           |           |          |
|---|-----------|-----------|----------|
| C | 1.345753  | -0.323777 | 0.000000 |
| C | 1.748344  | -1.664684 | 0.000000 |
| C | 0.821610  | -2.695550 | 0.000000 |
| C | -0.529422 | -2.357215 | 0.000000 |
| C | -0.942320 | -1.025076 | 0.000000 |
| C | -2.406891 | -0.855221 | 0.000000 |
| N | -2.964848 | -2.120917 | 0.000000 |
| S | -1.892813 | -3.464466 | 0.000000 |
| O | -3.052347 | 0.175351  | 0.000000 |
| H | -3.962073 | -2.259198 | 0.000000 |
| H | 1.142801  | -3.727992 | 0.000000 |
| H | 2.803214  | -1.904575 | 0.000000 |
| H | 2.091945  | 0.458434  | 0.000000 |
| H | -0.341526 | 1.026187  | 0.000000 |

## MIT (12,9) Active Space

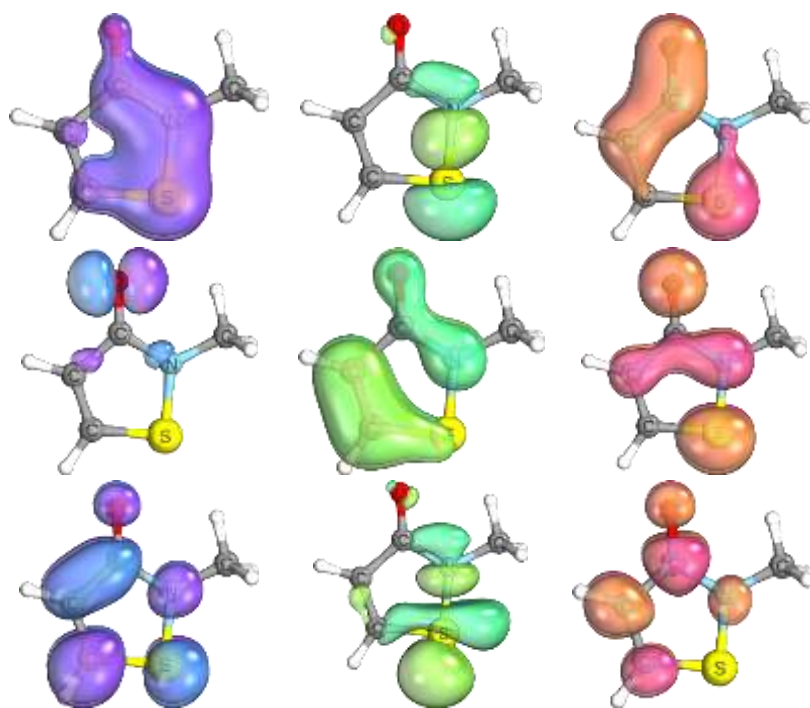

## CIT (12,9) Active Space

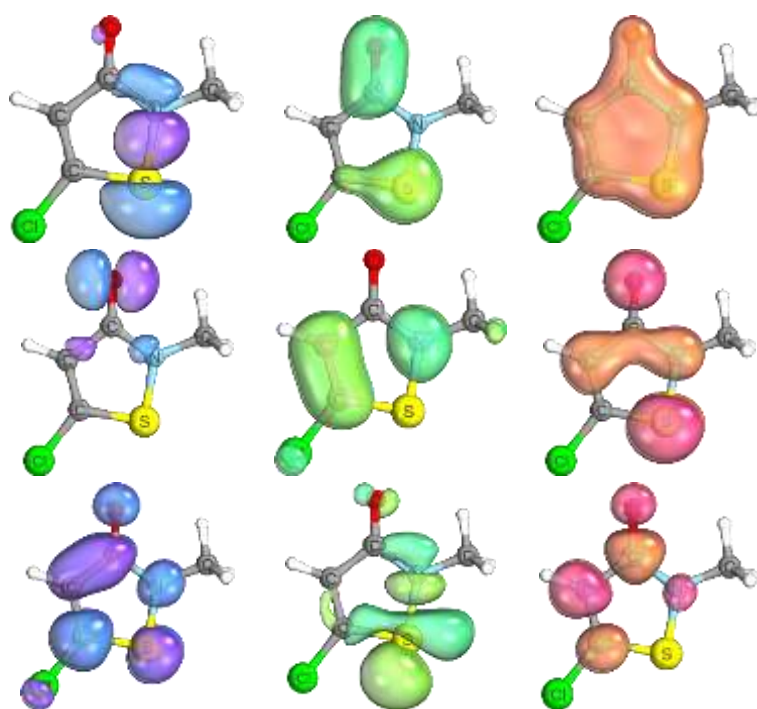

## BIT (16,13) Active Space

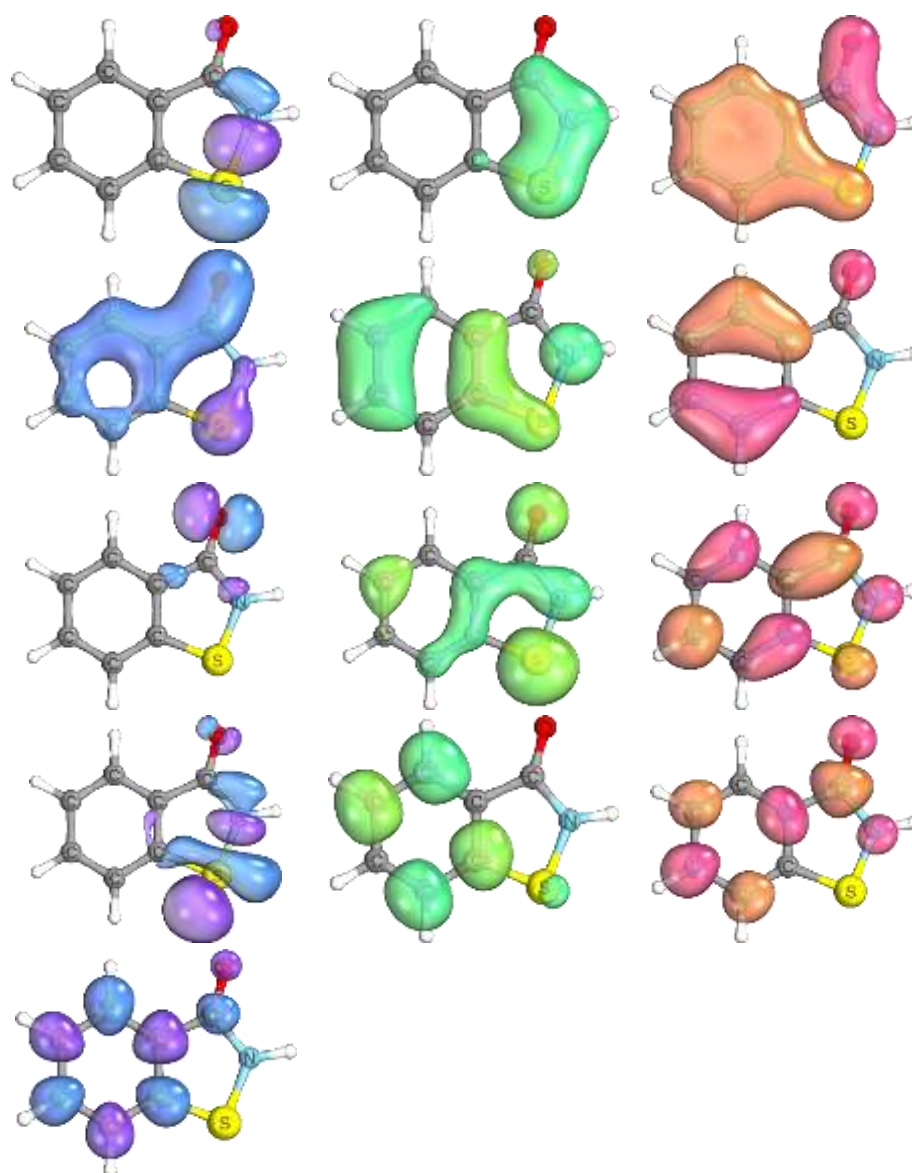

## S-N Dissociation Path XYZ Coordinates

P1

|   |             |             |            |
|---|-------------|-------------|------------|
| C | 0.00000000  | 0.00000000  | 0.00000000 |
| C | -1.35040900 | -0.08992100 | 0.00000000 |
| S | -2.14624000 | 1.45056300  | 0.00000000 |
| N | -0.62411600 | 2.22000200  | 0.00000000 |
| C | 0.49760100  | 1.38218400  | 0.00000000 |
| O | 1.64919200  | 1.79930400  | 0.00000000 |
| H | -0.54020500 | 3.22819600  | 0.00000000 |
| H | -1.96482300 | -0.98762900 | 0.00000000 |
| H | 0.68296300  | -0.84498500 | 0.00000000 |

P2

|   |            |            |            |
|---|------------|------------|------------|
| C | 0.0070235  | -0.0020548 | -0.0131961 |
| C | -1.3530250 | -0.0978126 | -0.0043806 |
| S | -2.1309400 | 1.4669226  | 0.0414893  |
| N | -0.6319210 | 2.2172979  | -0.0398177 |
| C | 0.5013577  | 1.3626221  | -0.0007117 |
| O | 1.6398061  | 1.8235033  | 0.0361971  |
| H | -0.5392393 | 3.2246739  | -0.0134954 |
| H | -1.9771864 | -0.9868145 | 0.0022489  |
| H | 0.6880873  | -0.8506238 | -0.0083339 |

P3

|   |            |            |            |
|---|------------|------------|------------|
| C | 0.0380126  | -0.0019987 | 0.0064602  |
| C | -1.3471072 | -0.0647993 | -0.0264407 |
| S | -2.2231983 | 1.4371098  | 0.0507291  |
| N | -0.5331744 | 2.2529534  | -0.0519738 |
| C | 0.5074915  | 1.3903720  | -0.0066124 |
| O | 1.6909907  | 1.8025751  | 0.0310705  |
| H | -0.3831759 | 3.2683026  | 0.0128743  |
| H | -1.9493908 | -0.9793677 | -0.0483350 |
| H | 0.7341795  | -0.8433562 | 0.0719035  |

P4

|   |            |            |            |
|---|------------|------------|------------|
| C | 0.0232445  | 0.0533178  | -0.0030557 |
| C | -1.3597250 | -0.0357182 | -0.0050718 |
| S | -2.3050182 | 1.3765983  | 0.0500778  |
| N | -0.4494557 | 2.3373712  | -0.0646852 |
| C | 0.5497905  | 1.4364583  | -0.0068271 |
| O | 1.7560448  | 1.7474133  | 0.0370442  |
| H | -0.1795979 | 3.3206057  | 0.0270746  |
| H | -1.8856390 | -0.9956087 | -0.0160540 |
| H | 0.6892519  | -0.8108833 | -0.0106824 |

P5

|   |            |            |            |
|---|------------|------------|------------|
| C | 0.0180173  | 0.1235577  | -0.0183113 |
| C | -1.3565856 | -0.0314682 | 0.0046861  |



|   |            |            |            |
|---|------------|------------|------------|
| S | -2.3708950 | 1.3193354  | 0.0594614  |
| N | -0.3747164 | 2.4510487  | -0.0971041 |
| C | 0.5495573  | 1.4846413  | -0.0190707 |
| O | 1.8102559  | 1.6604917  | 0.0599132  |
| H | -0.0519371 | 3.4152919  | 0.0305181  |
| H | -1.8169665 | -1.0265990 | -0.0046367 |
| H | 0.7115920  | -0.7185901 | -0.0244909 |

P6

|   |            |            |            |
|---|------------|------------|------------|
| C | 0.0138849  | 0.1332411  | -0.0283518 |
| C | -1.3386545 | -0.0254631 | 0.0063797  |
| S | -2.4437013 | 1.2878263  | 0.0660523  |
| N | -0.2899638 | 2.5152539  | -0.1011579 |
| C | 0.5716490  | 1.4830009  | -0.0313397 |
| O | 1.8361484  | 1.6565243  | 0.0723154  |
| H | 0.2189973  | 3.4107401  | -0.0818431 |
| H | -1.7869021 | -1.0268352 | 0.0154687  |
| H | 0.7044332  | -0.7106065 | -0.0363585 |

P7

|   |            |            |            |
|---|------------|------------|------------|
| C | 0.0126494  | 0.1510474  | -0.0312823 |
| C | -1.3433080 | -0.0020814 | 0.0161527  |
| S | -2.5261362 | 1.2519024  | 0.0639382  |
| N | -0.2180753 | 2.5669873  | -0.0972961 |
| C | 0.6440070  | 1.4817259  | -0.0264031 |
| O | 1.8778313  | 1.6533941  | 0.0634549  |
| H | 0.3934840  | 3.4001461  | -0.0820890 |
| H | -1.7703318 | -1.0151918 | 0.0334536  |
| H | 0.6767116  | -0.7163724 | -0.0403168 |

P8 – Conical Intersection

|   |             |             |             |
|---|-------------|-------------|-------------|
| C | -0.03743163 | 0.17229585  | -0.01284994 |
| C | -1.38516801 | -0.03356561 | 0.00113684  |
| S | -2.66365892 | 1.12424828  | 0.03647354  |
| N | -0.29736956 | 2.57802237  | -0.02357434 |
| C | 0.58056098  | 1.50801306  | 0.00499038  |
| O | 1.81732500  | 1.67626333  | 0.05533206  |
| H | 0.28707774  | 3.43089611  | -0.02990963 |
| H | -1.75655108 | -1.06866111 | -0.00684236 |
| H | 0.64257958  | -0.68247838 | -0.02475546 |

## S-C Dissociation Path XYZ Coordinates

P1

|   |           |           |          |
|---|-----------|-----------|----------|
| C | 0.000000  | 0.000000  | 0.000000 |
| C | -1.350408 | -0.089921 | 0.000000 |
| S | -2.146239 | 1.450562  | 0.000000 |
| N | -0.624116 | 2.220001  | 0.000000 |
| C | 0.497601  | 1.382183  | 0.000000 |
| O | 1.649191  | 1.799303  | 0.000000 |
| H | -0.540205 | 3.228195  | 0.000000 |
| H | -1.964822 | -0.987629 | 0.000000 |
| H | 0.682963  | -0.844985 | 0.000000 |

P2

|   |           |           |           |
|---|-----------|-----------|-----------|
| C | -0.004222 | -0.002453 | -0.000841 |
| C | -1.348178 | -0.137386 | 0.000940  |
| S | -2.178298 | 1.559421  | 0.000019  |
| N | -0.624496 | 2.244796  | -0.000719 |
| C | 0.483232  | 1.386251  | 0.001043  |
| O | 1.637319  | 1.794768  | 0.002815  |
| H | -0.494632 | 3.249850  | -0.001407 |
| H | -1.949008 | -1.044789 | -0.000275 |
| H | 0.703316  | -0.829432 | -0.003306 |

P3

|   |           |           |           |
|---|-----------|-----------|-----------|
| C | -0.009678 | -0.004773 | -0.001651 |
| C | -1.345537 | -0.185469 | 0.001966  |
| S | -2.205784 | 1.668751  | -0.000032 |
| N | -0.625236 | 2.269713  | -0.001383 |
| C | 0.467810  | 1.390289  | 0.002020  |
| O | 1.624433  | 1.789879  | 0.005491  |
| H | -0.449622 | 3.269546  | -0.002689 |
| H | -1.931684 | -1.102966 | -0.000552 |
| H | 0.722211  | -0.812796 | -0.006681 |

P4

|   |           |           |           |
|---|-----------|-----------|-----------|
| C | -0.016286 | -0.007029 | -0.002425 |
| C | -1.342311 | -0.234138 | 0.003070  |
| S | -2.228804 | 1.778394  | -0.000151 |
| N | -0.626283 | 2.294696  | -0.001996 |
| C | 0.451358  | 1.394253  | 0.002934  |
| O | 1.610545  | 1.784610  | 0.008034  |
| H | -0.405154 | 3.287230  | -0.003849 |
| H | -1.912717 | -1.162037 | -0.000845 |
| H | 0.739699  | -0.795130 | -0.010121 |

P5

|   |           |           |           |
|---|-----------|-----------|-----------|
| C | -0.023990 | -0.009288 | -0.003159 |
| C | -1.338360 | -0.283355 | 0.004240  |

|   |           |           |           |
|---|-----------|-----------|-----------|
| S | -2.247447 | 1.888235  | -0.000335 |
| N | -0.627590 | 2.319705  | -0.002564 |
| C | 0.433883  | 1.398098  | 0.003785  |
| O | 1.595651  | 1.778921  | 0.010446  |
| H | -0.361202 | 3.302853  | -0.004893 |
| H | -1.892002 | -1.221877 | -0.001167 |
| H | 0.755802  | -0.776481 | -0.013622 |

P6

|   |           |           |           |
|---|-----------|-----------|-----------|
| C | -0.032755 | -0.011610 | -0.003849 |
| C | -1.333564 | -0.333082 | 0.005465  |
| S | -2.261778 | 1.998194  | -0.000580 |
| N | -0.629111 | 2.344707  | -0.003089 |
| C | 0.415375  | 1.401781  | 0.004574  |
| O | 1.579736  | 1.772767  | 0.012729  |
| H | -0.317742 | 3.316364  | -0.005824 |
| H | -1.869454 | -1.282367 | -0.001534 |
| H | 0.770517  | -0.756892 | -0.017183 |

P7

|   |           |           |           |
|---|-----------|-----------|-----------|
| C | -0.042563 | -0.014052 | -0.004490 |
| C | -1.327824 | -0.383275 | 0.006734  |
| S | -2.271836 | 2.108218  | -0.000881 |
| N | -0.630804 | 2.369677  | -0.003573 |
| C | 0.395812  | 1.405261  | 0.005302  |
| O | 1.562773  | 1.766095  | 0.014885  |
| H | -0.274745 | 3.327707  | -0.006645 |
| H | -1.845003 | -1.343389 | -0.001959 |
| H | 0.783827  | -0.736402 | -0.020798 |

P8

|   |             |             |             |
|---|-------------|-------------|-------------|
| C | -0.06623171 | -0.06677969 | -0.02821659 |
| C | -1.32749176 | -0.50310323 | -0.02381444 |
| S | -2.32358203 | 2.13400233  | 0.02745615  |
| N | -0.68139677 | 2.33491659  | 0.02771068  |
| C | 0.34101100  | 1.36402051  | 0.01481518  |
| O | 1.50522303  | 1.73148410  | 0.03300819  |
| H | -0.29507412 | 3.28285612  | 0.04545056  |
| H | -1.81048180 | -1.48088374 | -0.05598025 |
| H | 0.79319615  | -0.75176410 | -0.06388147 |
